# Supplementary material for: Efficient CsPbBr3 Perovskite Solar Cells with Storage Stability > 340 Days
Source: MDPI journal article supplement (doi:10.3390/en15207740), 2022-10-19
Supplement: s1 [file s1]

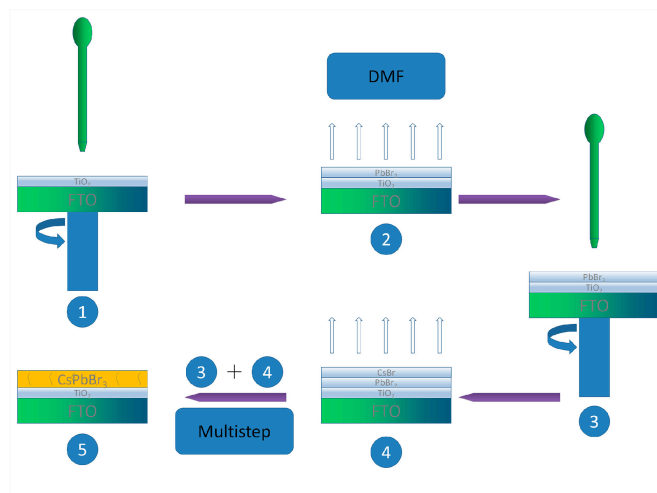

**Supplementary Figure S1.** Schematic diagram of multi-step spin-coating process to prepare CsPbBr<sub>3</sub> films

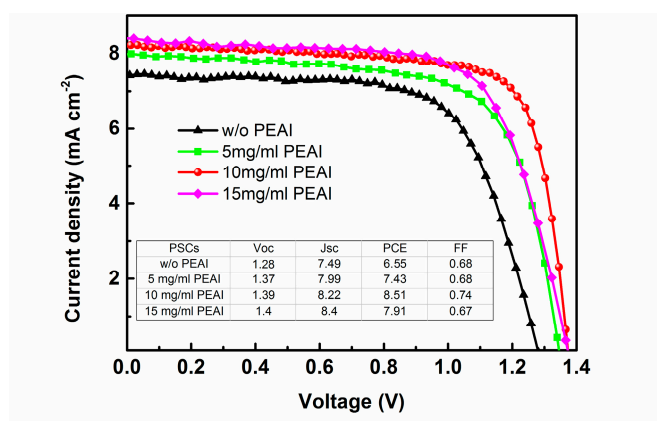

**Supplementary Figure S2.** J-V characteristics of various CsPbBr<sub>3</sub> PSCs under illumination (AM 1.5 G, 100 mW cm<sup>-2</sup>) undoped and doped with 5, 10 and 15 mg/mL PEAI, measured at the maximum power point.

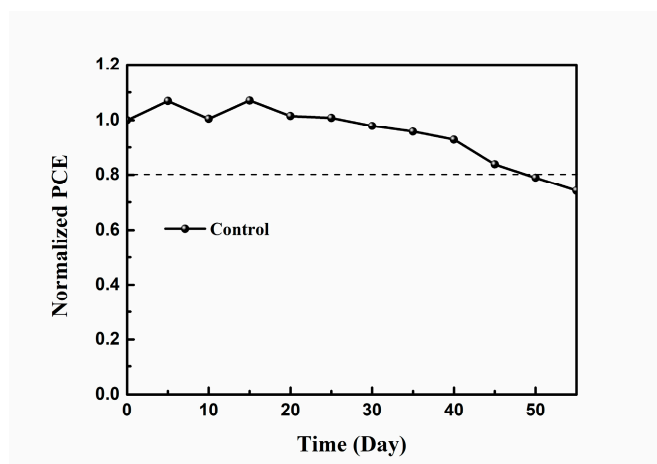

**Supplementary Figure S3.** Storage stability (in the ambient air, without encapsulation) of CsPbBr<sub>3</sub> PSCs without PEAI-doping.

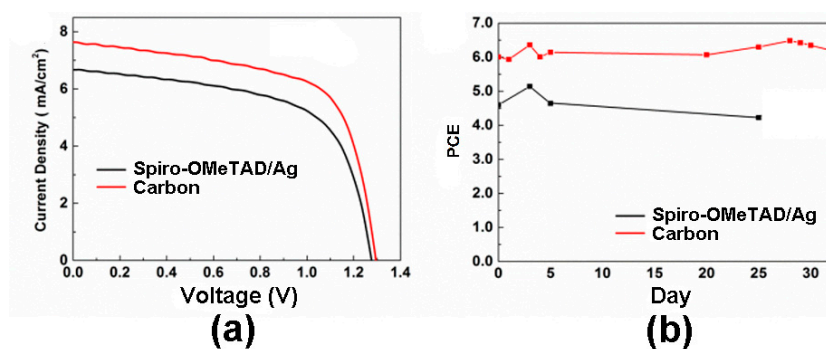

**Supplementary Figure S4.** (a) J–V characteristics and (b) storage stability (in the ambient air, without encapsulation) of CsPbBr<sub>3</sub> PSCs with different electrode.
