# Supplementary material for: Efficient CsPbBr3 Perovskite Solar Cells with Storage Stability > 340 Days
Source: MDPI journal article supplement (doi:10.3390/en15207740), 2022-10-19
Supplement: s1 [file s1]

Archive with 1 entries (1 files):
- energies-1928893-supplementary.pdf
